# Supplementary material for: Photosensitive Dye as an Ideal Peroxymonosulfate Activator for Efficient Self-Degradation: A Novel Idea of Using Waste to Treat Waste
Source: MDPI journal article supplement (doi:10.3390/molecules28104237), 2023-05-22
Supplement: s1 [file s1]

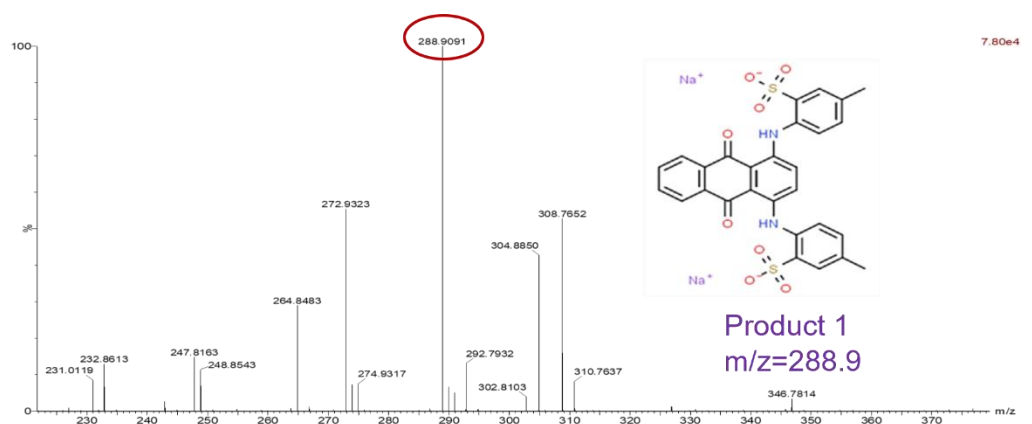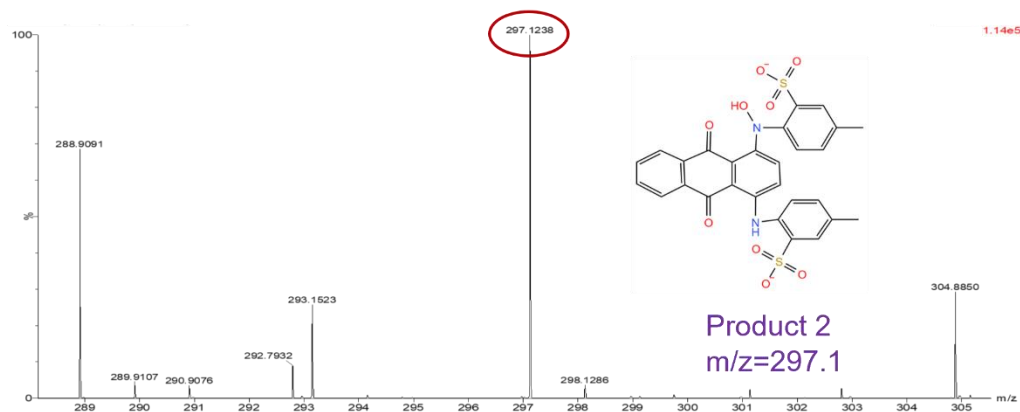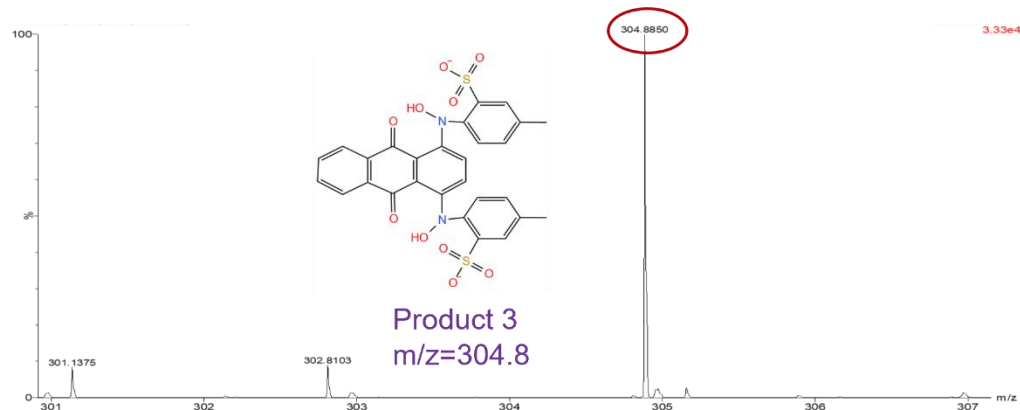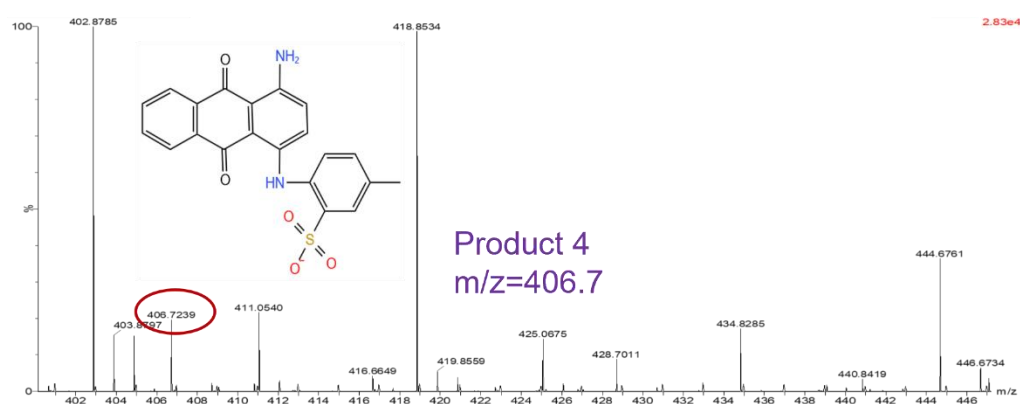

Figure S1: Mass spectra of alizarin green degradation products 1 to 4

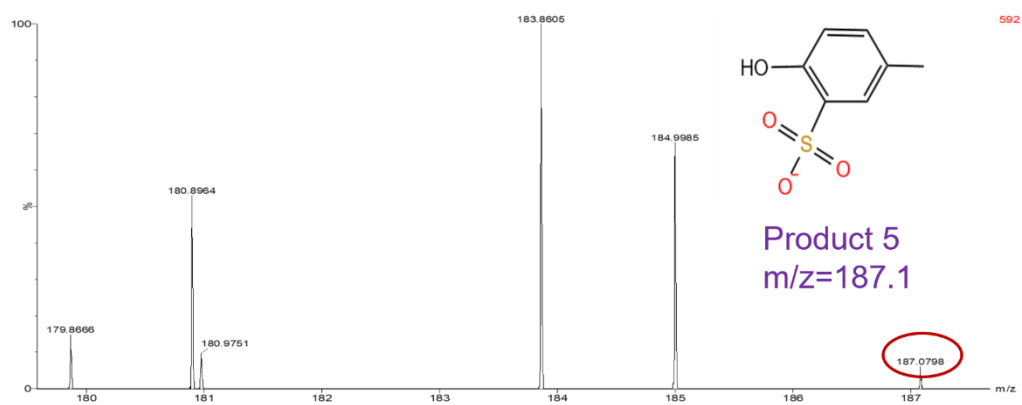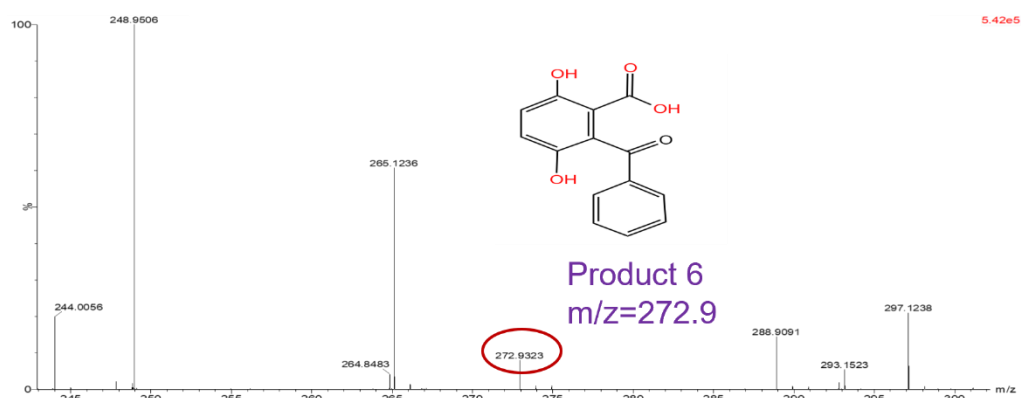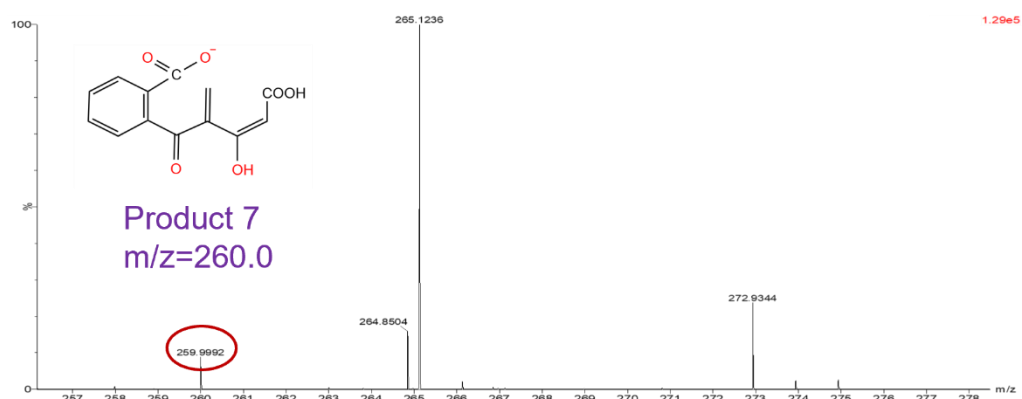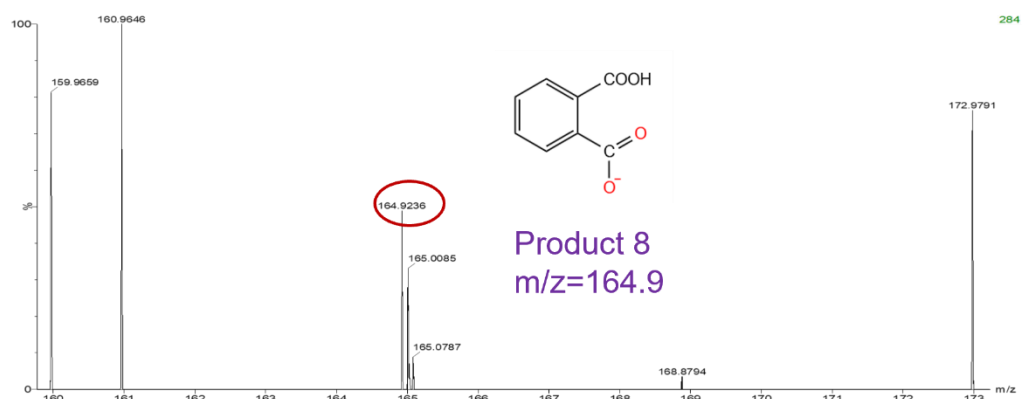

Figure S2: Mass spectra of alizarin green degradation products 5 to 8
